# Supplementary material for: Influence of ligand environments on the structures and luminescence properties of homoleptic cadmium(ii) pyridyl functionalized dithiocarbamates
Source: Royal Society of Chemistry journal article supplement (doi:10.1039/c4ce00510d), 2014-01-01
Supplement: c4ce00510d1.pdf [file c4ce00510d1.pdf]

## ELECTRONIC SUPPLEMENTARY INFORMATION (ESI)

### Influence of ligand environments on the structures and luminescent properties of homoleptic cadmium (II) pyridyl functionalized dithiocarbamates

Vinod Kumar,<sup>a</sup> Vikram Singh,<sup>a</sup> Ajit N. Gupta,<sup>a</sup> Krishna K. Manar,<sup>a</sup> Michael. G. B. Drew<sup>b</sup> and Nanhai Singh<sup>\*a</sup>

<sup>a</sup>Department of Chemistry, Banaras Hindu University, Varanasi 221005, India <sup>b</sup>Department of Chemistry, University of Reading, Whiteknights, Reading, RG6 6AD, U.K.

**Table S1.** Selected bond lengths (Å) and angles (°) for complexes **1** and **2**.

| Bond Distances          | <b>1</b>   | <b>2</b>  |
|-------------------------|------------|-----------|
| Cd(1)—S(11)             | 2.659(1)   | 2.680(1)  |
| Cd(1)—S(13)             | 2.652(1)   | 2.664(1)  |
| Cd(1)—S(41)             | 2.665(1)   | 2.663(1)  |
| Cd(1)—S(43)             | 2.687(1)   | 2.665(1)  |
| Cd(1)—N(34) \$1         | 2.539(3)   | 2.486(3)  |
| Cd(1)—N(64) \$2         | 2.500(3)   | 2.486(3)  |
| S(11)—C(12)             | 1.723(3)   | 1.729(3)  |
| S(13)—C(12)             | 1.708(3)   | 1.724(3)  |
| S(41)—C(42)             | 1.711(3)   | 1.727(3)  |
| S(43)—C(42)             | 1.727(3)   | 1.711(3)  |
| N(14)—C(12)             | 1.346(4)   | 1.340(4)  |
| N(44)—C(42)             | 1.346(4)   | 1.337(4)  |
| Bond Angles             |            |           |
| S(11)—Cd(1)—S(13)       | 68.06(3)   | 67.81(3)  |
| S(41)—Cd(1)—S(43)       | 67.32(3)   | 67.95(3)  |
| S(43)—Cd(1)—N(34)\$1    | 92.11(7)   | 87.14(6)  |
| S(11)—Cd(1)—S(41)       | 176.55(3)  | 176.58(2) |
| S(13)—Cd(1)—S(41)       | 108.79(3)  | 108.80(3) |
| S(11)—Cd(1)—S(43)       | 115.78(3)  | 115.44(3) |
| S(13)—Cd(1)—S(43)       | 175.79(3)  | 176.65(3) |
| S(13)—Cd(1)—N(64)\$2    | 92.38(7)   | 85.15(7)  |
| S(43)—Cd(1)—N(64)\$2    | 89.44(7)   | 93.77(7)  |
| S(11)—Cd(1)—N(34)\$1    | 93.31(8)   | 88.83(7)  |
| S(41)—Cd(1)—N(34)\$1    | 84.96(8)   | 90.92(7)  |
| N(36)\$1—Cd(1)—N(64)\$2 | 176.01(11) | 176.96(9) |
| S(41)—Cd(1)—N(64)\$2    | 92.25(7)   | 86.74(7)  |
| S(11)—Cd(1)—N(64)\$2    | 89.33(7)   | 93.39(7)  |
| S(13)—Cd(1)—N(34)\$1    | 85.83(8)   | 93.78(7)  |

Symmetry elements

In **1** \$1 1-x, 1/2+y, 1.5-z, \$2 -x, -1/2+y, 1.5-z

In **2** \$1 1-x -1/2+y, 1.5-z \$2 2-x, 1/2+y, 1.5-z

**Table S2.** Selected bond lengths (Å) and angles (°) for complexes **3** and **4**.

| Bond Distances       | <b>3</b> | <b>4</b> |
|----------------------|----------|----------|
| Cd(1)—S(11)          | 2.625(1) | 2.614(1) |
| Cd(1)—S(13)          | 2.677(1) | 2.694(1) |
| Cd(1)—N(34)\$1       | 2.480(3) | 2.502(3) |
| S(11)—C(12)          | 1.718(3) | 1.719(3) |
| S(13)—C(12)          | 1.713(3) | 1.717(3) |
| N(14)—C(12)          | 1.342(4) | 1.341(4) |
| Bond Angles          |          |          |
| S(11)—Cd(1)—S(13)    | 68.19(3) | 67.99(3) |
| S(11)—Cd(1)—N(34)\$1 | 89.32(7) | 88.15(9) |
| S(13)—Cd(1)—N(34)\$1 | 93.40(7) | 92.08(8) |

\$1 Symmetry element in **3**  $1/2+x, -y-1/2, -z$

In **4**  $1/2-x, 2-y, -1/2+z$

**Table S3.** Selected bond lengths (Å) and angles (°) for complexes **5**

|                |          |                       |            |
|----------------|----------|-----------------------|------------|
| Cd (1)-S(11)   | 2.570(1) | S(11)- Cd(1)-S(13)    | 68.58(5)   |
| Cd (1)-S(13)   | 2.690(1) | S(41)- Cd(1)-S(43)    | 69.05(5)   |
| Cd (1)-S(41)   | 2.635(1) | N(56)\$1- Cd(1)-S(11) | 109.34(10) |
| Cd(1)-S(43)    | 2.589(1) | N(56)\$1- Cd(1)-S(13) | 94.77(10)  |
| Cd(1)-N(56)\$1 | 2.279(4) | N(56)\$1- Cd(1)-S(43) | 117.07(11) |
| S(11)-C(12)    | 1.722(5) | N(56)\$1- Cd(1)-S(41) | 104.57(10) |
| S(13)-C(12)    | 1.729(5) | S(11)- Cd(1)-S(41)    | 104.85(5)  |
| C(12)-N(14)    | 1.341(5) | S(11)- Cd(1)-S(43)    | 133.29(5)  |
| S(41)-C(42)    | 1.714(5) | S(13)- Cd(1)-S(41)    | 160.65(5)  |
| S(43)-C(42)    | 1.730(5) | S(13)- Cd(1)-S(43)    | 101.59(5)  |
| C(42)-N(44)    | 1.348(5) | S(11)- Cd(1)-S(13)    | 68.58(5)   |

\$1 symmetry element in **1**  $1-x, -y, 1-z$  in **2**  $-x, -y, -z$

**Table S4.** Selected bond lengths (Å) and angles (°) for complex (**6**).

| Bond lengths/Å |          | Bond angles/°     |           |
|----------------|----------|-------------------|-----------|
| Cd(2) – S(11)  | 2.733(2) | S(41)–Cd(2)–S(43) | 69.95(5)  |
| Cd(2) – S(13)  | 2.538(2) | S(11)–Cd(2)–S(13) | 68.54(5)  |
| Cd(2) – S(41)  | 2.539(2) | S(73)–Cd(2)–S(41) | 107.42(5) |
| Cd(2) – S(43)  | 2.648(2) | S(73)–Cd(2)–S(11) | 93.73(4)  |
| Cd(2) – S(73)  | 2.635(1) | S(11)-Cd(2)–S(41) | 102.89(5) |
| Cd(1) – S(71)  | 2.585(1) | S(73)–Cd(2)–S(43) | 103.37(5) |
| Cd(1) – S(73)  | 2.681(1) | S(73)–Cd(2)–S(13) | 107.19(5) |

|               |          |                    |           |
|---------------|----------|--------------------|-----------|
| Cd(1) – S(11) | 2.914(1) | S(11)–Cd(2) –S(43) | 162.74(5) |
| N(14) – C(12) | 1.338(6) | S(13)–Cd(2) –S(41) | 144.79(6) |
| C(12) – S(11) | 1.736(6) | S(13)–Cd(2) –S(43) | 107.78(6) |
| C(12) – S(13) | 1.707(6) | Cd(1)–S(11)–Cd(2)  | 85.33(4)  |
| C(42) – N(44) | 1.351(8) | S(71)–Cd(1)–S(73)  | 68.86(4)  |
| S(41) – C(42) | 1.713(6) | S(71)–Cd(1)–S(11)  | 91.33(4)  |
| S(43) – C(42) | 1.708(7) | S(11)–Cd(1)–S(73)  | 88.77(4)  |
| S(71) – C(72) | 1.713(5) | Cd(1)–S(73)–Cd(2)  | 92.17(4)  |
| S(73) – C(72) | 1.756(5) |                    |           |
| N(74) –C72)   | 1.327(6) |                    |           |

**Table S5.** Hydrogen bonds /Å, in complex **5**.

| D-H...A       | d(D-H)/Å | d(H-A)/Å | d(D-A)/Å | D-H-A/° | Symmetry element of acceptor atom |
|---------------|----------|----------|----------|---------|-----------------------------------|
| N34-H34...O1  | 0.86     | 2.10     | 2.958(8) | 178     | 1-x,1-y,2-z                       |
| N64-H64...N26 | 0.86     | 2.07     | 2.923(6) | 168     | 1+x,y,-1+z                        |
| C2-H2C...S13  | 0.96     | 2.97     | 3.751(4) | 139     | x,y,-1+z                          |

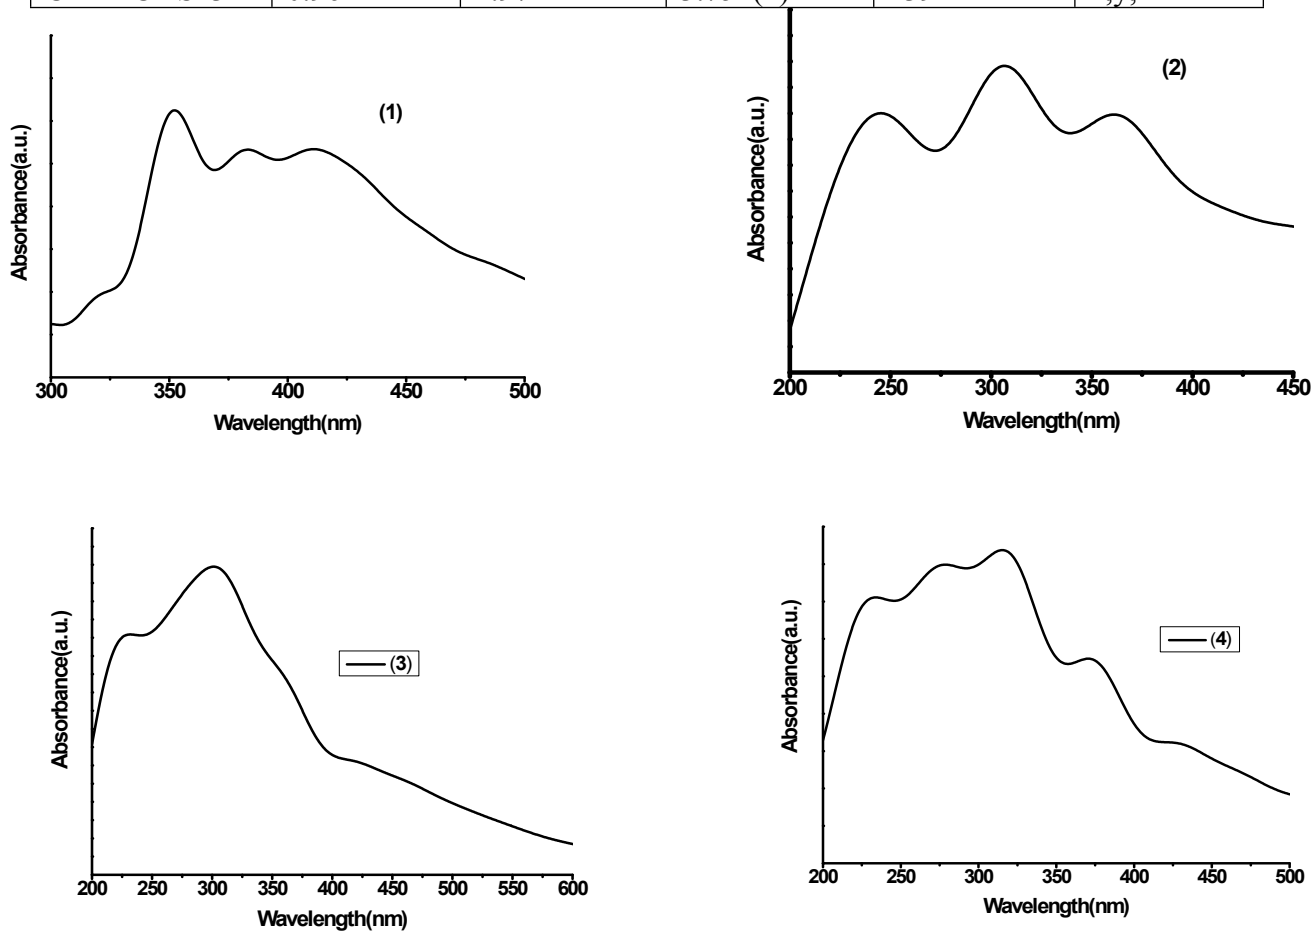

**Fig. S1** UV-Vis. spectra of complexes as nujol mull (**1-4**)

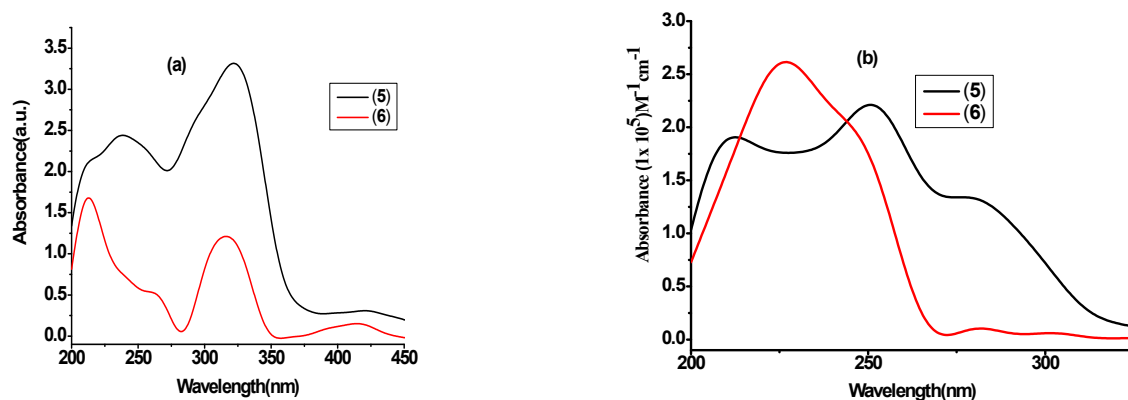

**Fig. S2** UV-Vis. spectra of **5** and **6** (a) as nujol mull (b) in  $10^{-5}$  DMSO.

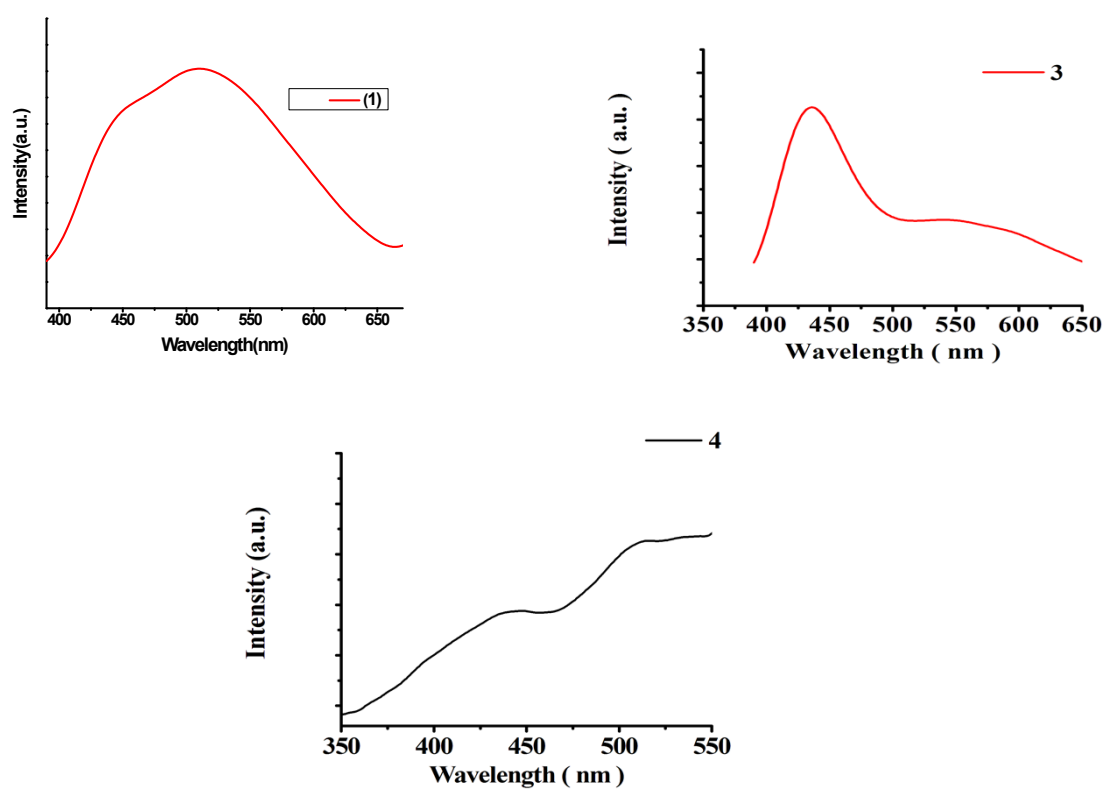

**Fig. S3a** Photo luminescent spectra in solid state (**1**, **3** and **4**) ( $\lambda_{\text{ex}} \sim 400\text{-}410$  nm)

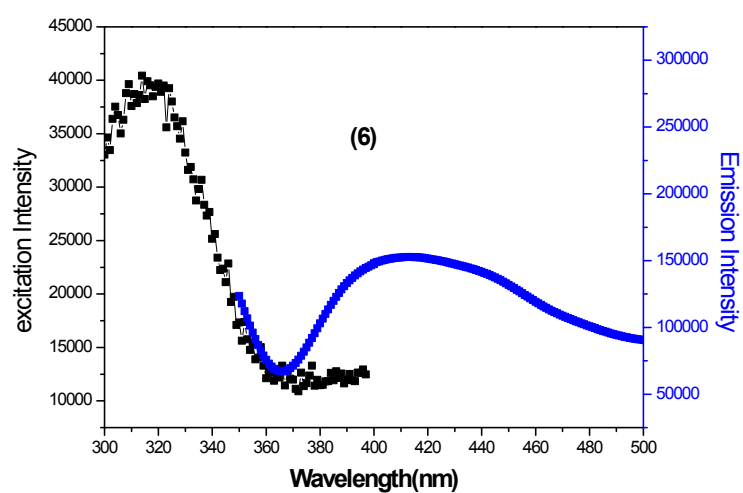

Fig. S3b Photo luminescent spectra in solid state of 6.

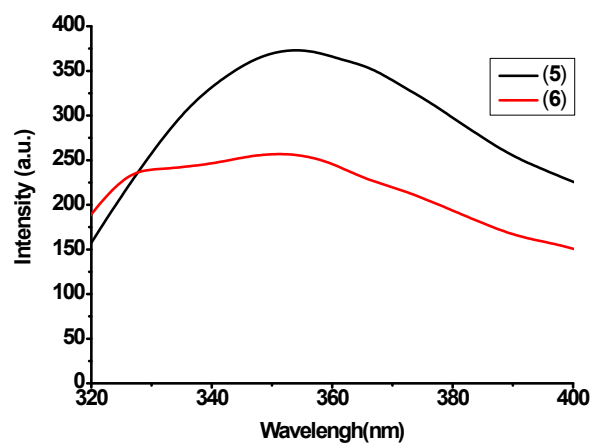

Fig. S4 Photo luminescent spectra in solution (5 and 6) at room temperature ( $\lambda_{ex} = 300$  nm)

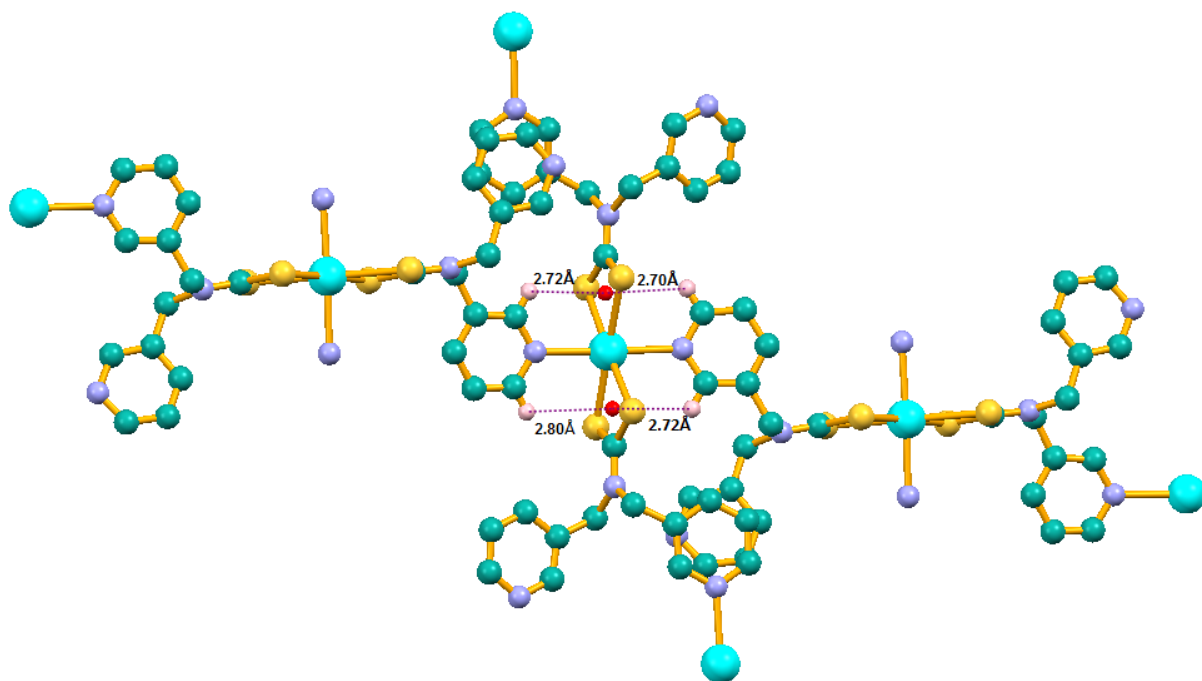

**Fig. S5** supramolecular structure of **2** sustained by the C-H... $\pi$  (chelate = CdS<sub>2</sub>C) interactions

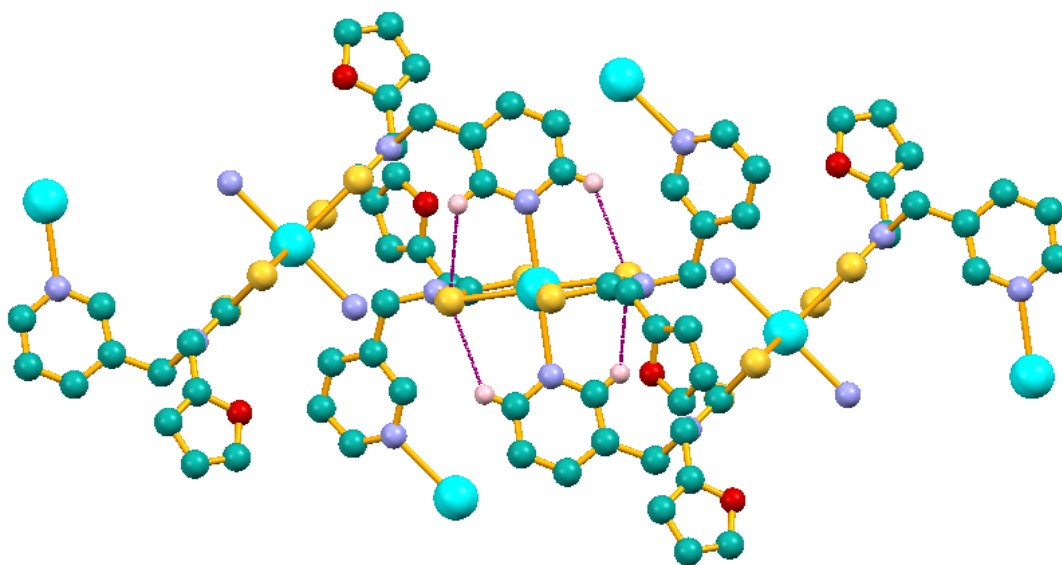

**Fig. S6** View of C-H...S interactions in **3** deviating from 2-D plane (hydrogen atoms, except those forming hydrogen bonds, omitted for clarity).

are  
for

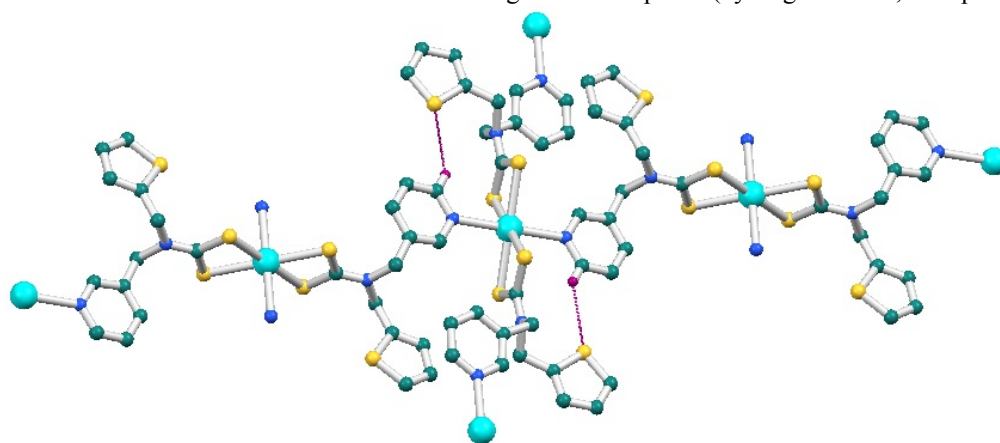

**Fig. S7** View of C-H...S interactions to stabilized complex **4** (hydrogen atoms, except those forming hydrogen bonds, are omitted for clarity).

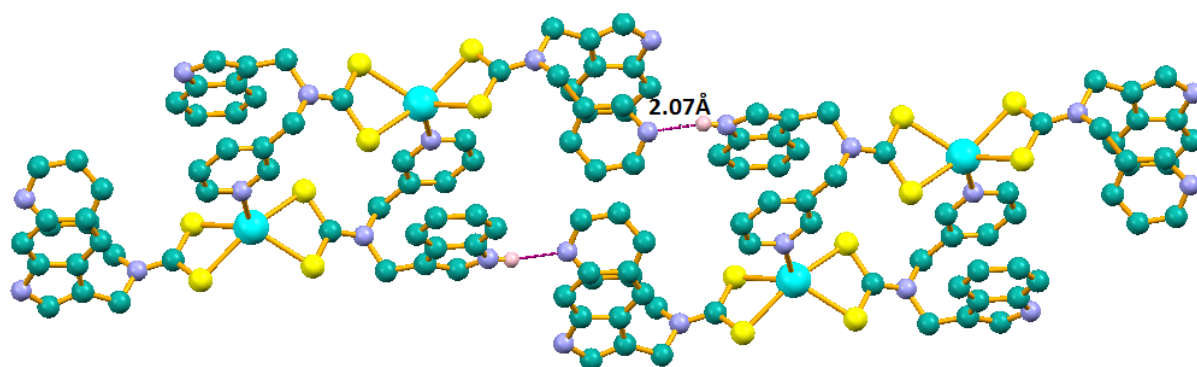

**Fig. S8** View of the 1-D chain motifs for **5** along the *b* axis (hydrogen atoms, except those forming hydrogen bonds, are omitted for clarity).

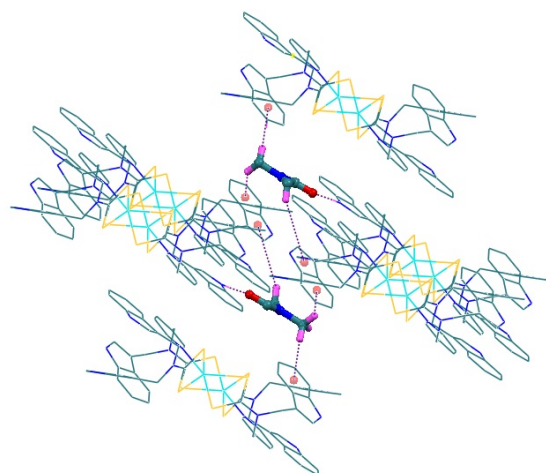

**Fig. S9** C-H... $\pi$  interactions between solvent and complex leading to 3-D supramolecular chain in **5**.

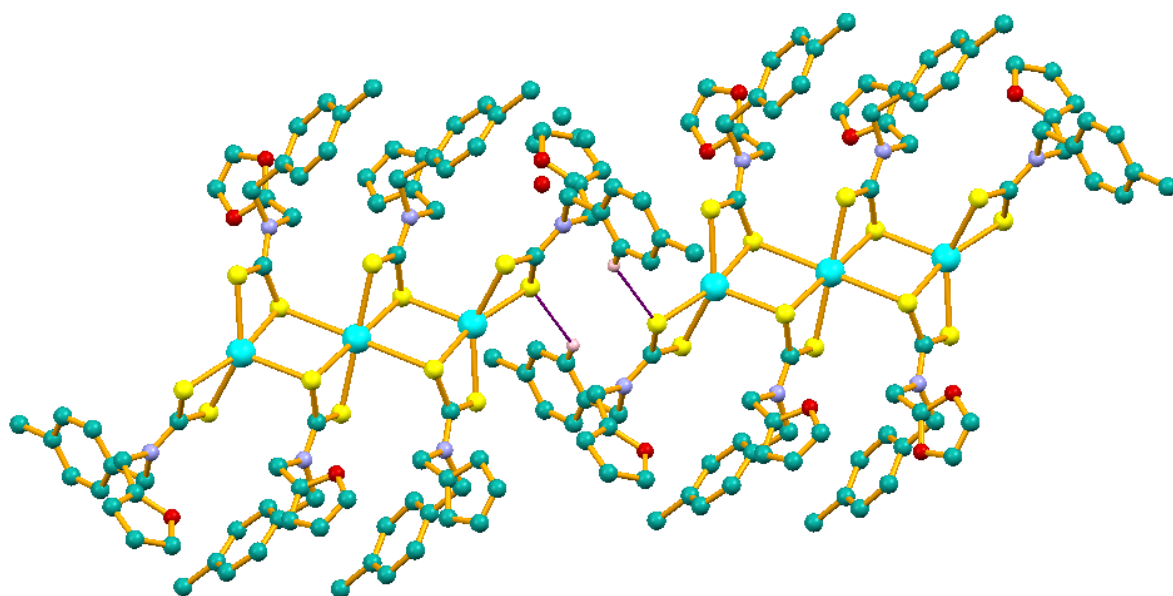

**Fig. S10** supramolecular structure is stabilised through C-H...S hydrogen bonding interactions

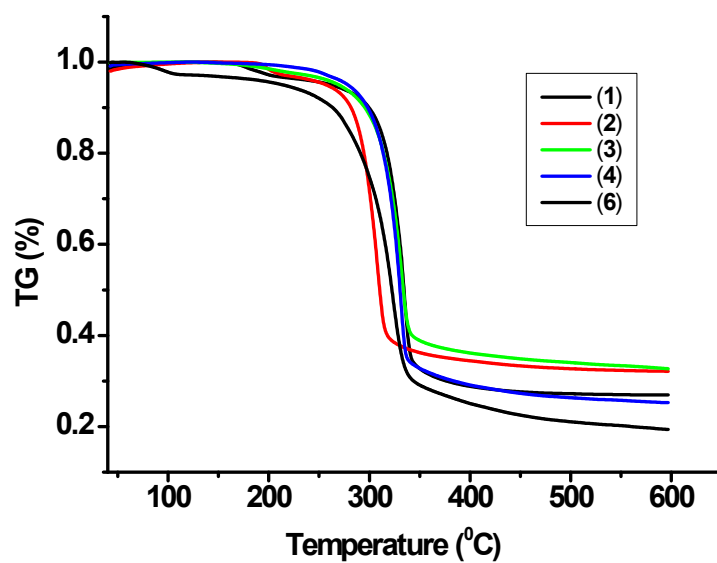

**Fig. S11** Superimposed thermogravimetric (TG) trace of the complexes.



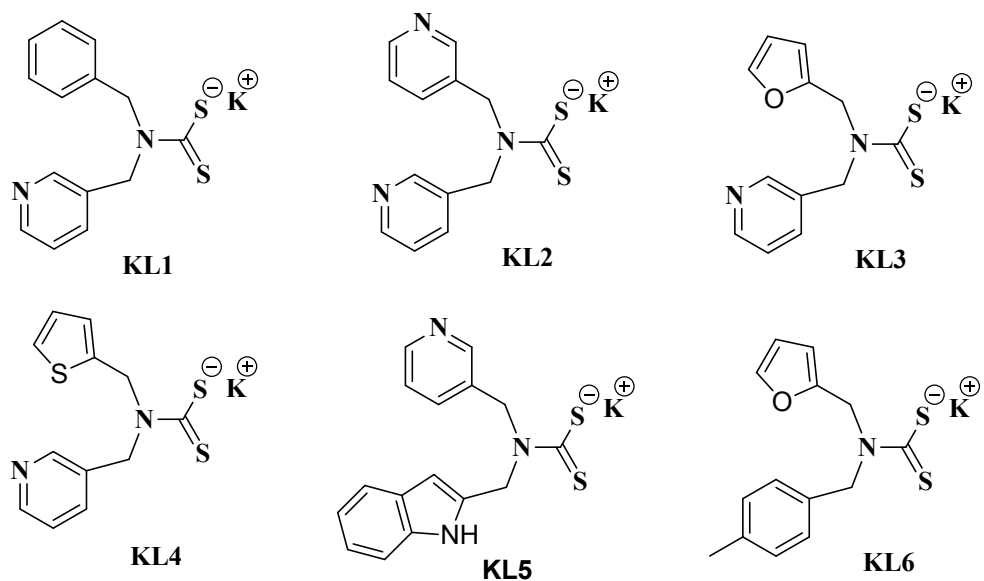

**Fig. 12** Structures of the potassium salt of the ligands used in this work.

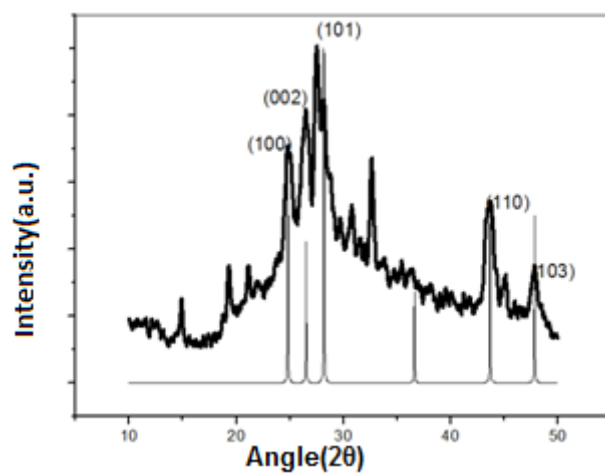

(a)

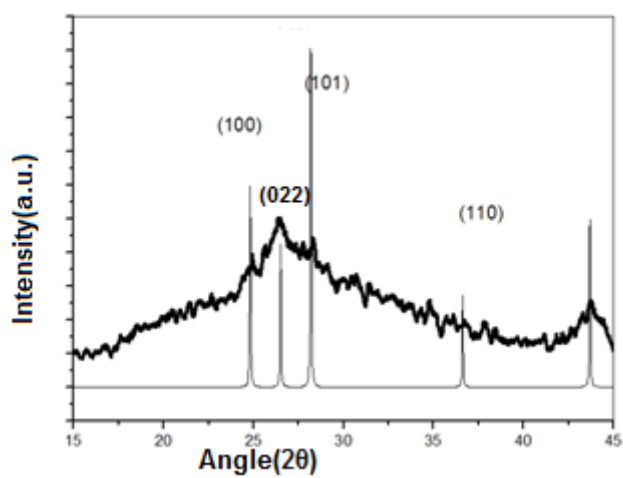

(b)

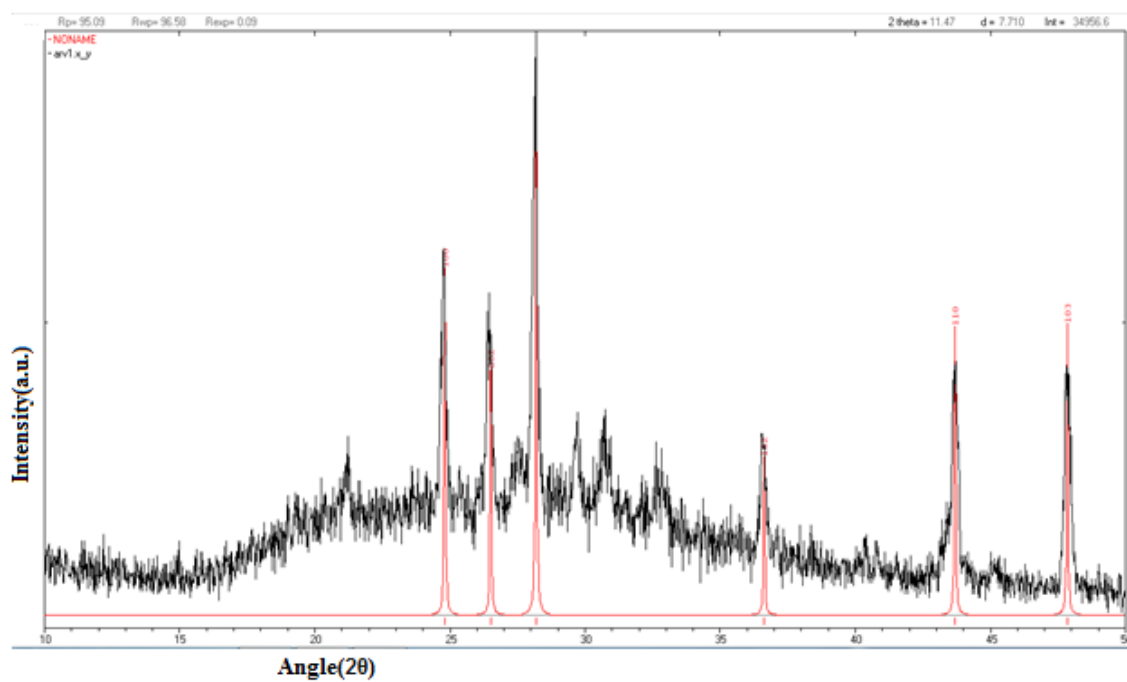

(c)

Fig. S13 PXRD patterns of TGA product (CdS) of 1, 2 and 6 in a, b and c respectively.

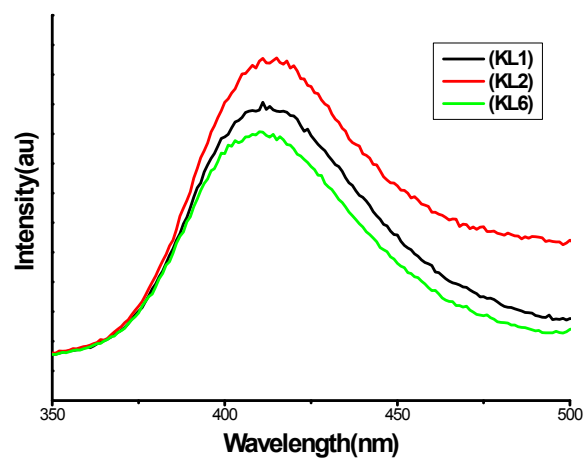

**Fig. S14** Photoluminescent spectra of ligands in solid state ( $\lambda_{\text{ex}} = 280 \text{ nm}$ )
